# Supplementary material
Source: Springer Nature journal article supplement (https://www.springermedizin.de/resource/supplementary/12957_2012_1048_MOESM3_ESM.pdf/9562224)

**A**

□ Con □ L-Gln □ L-Arg □ L-Ala

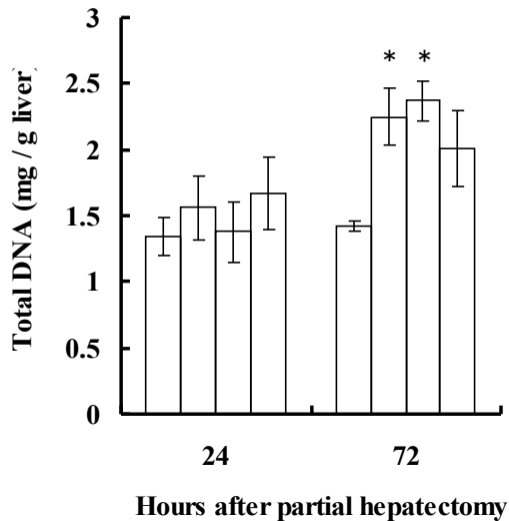**B**

□ Con □ L-Gln □ L-Arg □ L-Ala

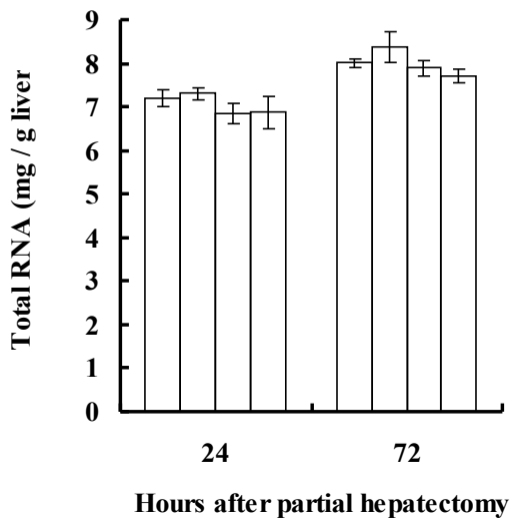

Supplement: MOESM3 [file 9562224]
